# Supplementary material for: Amino acid-assisted effect on hydrate-based CO2 storage in porous media with brine
Source: Royal Society of Chemistry journal article supplement (doi:10.1039/d4ra00330f), 2024-01-01
Supplement: d4ra00330f1.pdf [file d4ra00330f1.pdf]

## Supporting Information

### **Amino Acids assisted effect on hydrate-based CO<sub>2</sub> Storage in Porous Media with Brine**

Amirun Nissa Rehman<sup>a,\*</sup>, Cornelius B. Bavoh<sup>b,c</sup>, Mohd Yusuf Khan<sup>a</sup>, Bhajan Lal<sup>b,\*</sup>

<sup>a</sup> *Interdisciplinary Research Center for Hydrogen Technologies and Carbon Management, King Fahd University of Petroleum & Minerals, Dhahran, 31261 Saudi Arabia.*

<sup>b</sup> *Chemical Engineering Department, Universiti Teknologi PETRONAS, Bandar Seri Iskandar, 32610 Perak Darul Ridzuan, MALAYSIA*

<sup>c</sup> *Department of Chemical and Petrochemical Engineering, University of Mines and Technology, P.O. Box 237, Tarkwa, Ghana*

\*Corresponding author: Email: bhajan.lal@utp.edu.my; amirunrehman2728@gmail.com  
Phone: (O) +6053687619; (HP) +60103858473; Fax: +6053656176

Number of pages: 5

Number of tables: 2

Number of figures: 3

- Table S1. Properties of the unconsolidated quartz sand.

**Table S1.** Properties of the unconsolidated quartz sand.

| Porous media | Particle size (mm) | Average pore size (nm) | Porosity (%) | Surface area (m <sup>2</sup> /g) |
|--------------|--------------------|------------------------|--------------|----------------------------------|
| Quartz sand  | 0.6 - 0.8          | 8.13420                | ~38          | 1.1000                           |

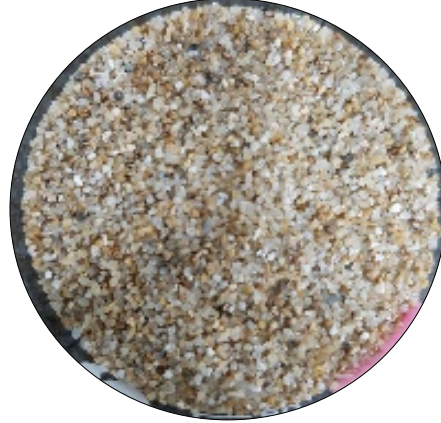

Figure S1. Image of the sorted unconsolidated quartz sand.

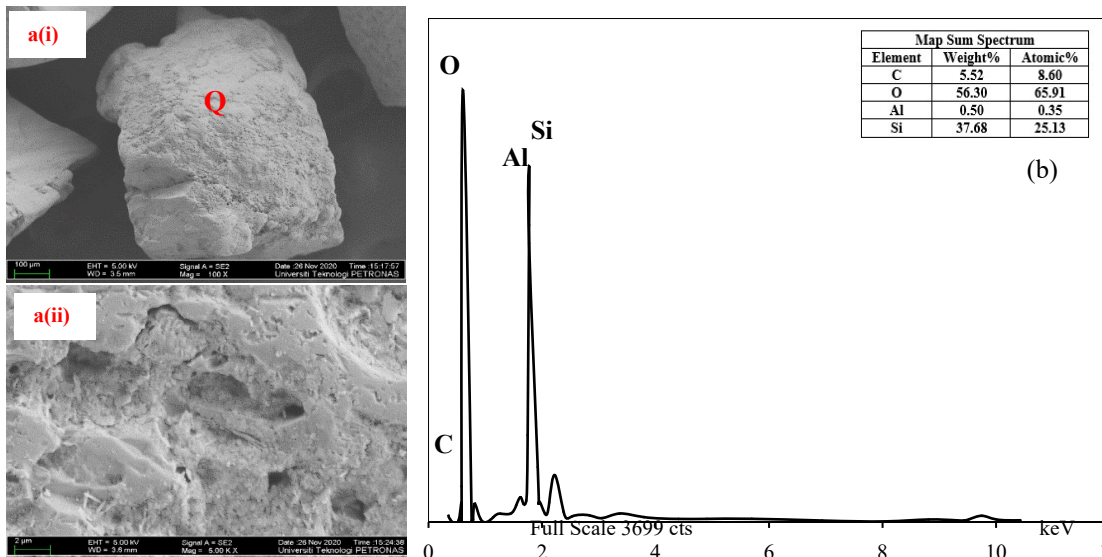

Figure S2. (a) FESEM images of unconsolidated sand showing crystalline quartz grains; (b) EDX spectrum of the unconsolidated sand showing predominant silica (Si) composition

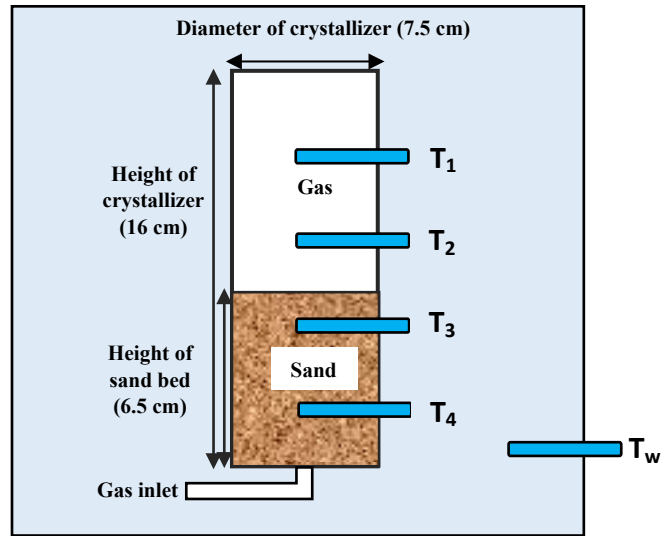

Figure S3. Schematic diagram of the inner cell of sandstone hydrate reactor.

Table S2. Repeated runs of measured CO<sub>2</sub> hydrate formation kinetic data at 0.2 wt.% of L-meth, L-iso, L-threo and SDS in 3.3 wt.% brine solution at 4 MPa and 274.15 K in quartz sand.

| System         | Induction time (hr) |       |      | CO <sub>2</sub> gas consumed (mol) |        |        | CO <sub>2</sub> gas uptake (mol/mmol) |       |       | Hydrate formation rate (mmol/hr) |       |       | C <sub>gh</sub> (%) |       |       | C <sub>wh</sub> (%) |       |       |
|----------------|---------------------|-------|------|------------------------------------|--------|--------|---------------------------------------|-------|-------|----------------------------------|-------|-------|---------------------|-------|-------|---------------------|-------|-------|
|                | Run 1               | Run 2 | Mean | Run 1                              | Run 2  | Mean   | Run 1                                 | Run 2 | Mean  | Run 1                            | Run 2 | Mean  | Run 1               | Run 2 | Mean  | Run 1               | Run 2 | Mean  |
| Brine          | 31                  | 25    | 28   | 0.3970                             | 0.4570 | 0.4270 | 53.10                                 | 61.12 | 57.11 | 7.174                            | 7.814 | 7.494 | 31.86               | 36.67 | 34.27 | 35.04               | 40.34 | 37.69 |
| 0.2-Methionine | 89                  | 111   | 100  | 0.6968                             | 0.6168 | 0.6568 | 96.43                                 | 85.36 | 90.89 | 1.773                            | 2.573 | 2.173 | 57.28               | 50.70 | 53.99 | 63.01               | 55.77 | 59.39 |
| 0.2-Isoleucine | 120                 | 104   | 112  | 0.2833                             | 0.2413 | 0.2623 | 39.21                                 | 33.39 | 36.30 | 0.136                            | 0.616 | 0.376 | 23.29               | 19.84 | 21.56 | 25.62               | 21.82 | 23.72 |
| 0.2 Threonine  | 14.6                | 18.6  | 16.6 | 0.4336                             | 0.4838 | 0.4587 | 53.33                                 | 59.50 | 56.41 | 4.927                            | 5.927 | 5.427 | 32.00               | 35.70 | 33.85 | 35.19               | 39.27 | 37.23 |
| 0.2 SDS        | 165                 | 135   | 150  | 0.5759                             | 0.4939 | 0.5349 | 71.81                                 | 61.58 | 66.69 | 1.242                            | 1.602 | 1.422 | 43.08               | 36.95 | 40.02 | 47.39               | 40.64 | 44.02 |
